# Supplementary material
Source: PubMed Central journal article supplement (PMC4085163)
Supplement: NIHMS335675-supplement-Supplementary.pdf [file NIHMS335675-supplement-Supplementary.pdf]

## **Electronic supplementary material**

### **Methods**

*Cell culture and transient transfection* INS-1 cells were maintained at 37°C under 5% CO<sub>2</sub> and at 95% humidity in RPMI supplemented with 10% (vol./vol) heat-inactivated fetal bovine serum, penicillin (100 µg/ml) and streptomycin (0.25 µg/ml). MIN6 cells were maintained as above, in DMEM supplemented with 15% (vol./vol.) fetal bovine serum, penicillin (100 µg/ml) and streptomycin (0.25 µg/ml). Transfections were done with lipofectAMINE2000 (Invitrogen, San Diego, CA, USA).

*Cell proliferation assay* Proliferation of INS-1 cells was determined by incorporation of BrdU into newly synthesised DNA of proliferating cells. Cells in 96-well plates were treated with SDF-1 (10 nmol/l), exendin-4 (2 nmol/l) or PBS overnight, then pulse-labelled with BrdU for 4 h. BrdU staining was measured with a kit (Delfia Cell Proliferation kit; Perkin Elmer, Wellesley, MA, USA).

*MTT assay* Growth of INS-1 cells was determined by the MTT system. Serum starved INS-1 cells in 96-well plates were treated with SDF-1 (10 nmol/l), exendin-4 (2 nmol/l) or PBS for 48 h and then subjected to MTT assay (Sigma-Aldrich, St Louis, MO, USA).

*Gene expression profiling on focused microarrays* INS-1 cells were treated or not with 10 nmol/l SDF-1 for 4 h. Total RNA was isolated and biotin-labelled complementary RNAs were generated using a kit (TrueLabeling-AMP Linear RNA Amplification; SuperArray Bioscience, Frederick, MD, USA). The WNT-signalling pathway-focused microarray filters

**ESM Table 1** Superarray results for mRNAs regulated by SDF-1 in INS-1 cells

| Number | Genebank number | Symbol                     | Description                                                                     | mRNA change by SDF-1 <sup>a</sup> |
|--------|-----------------|----------------------------|---------------------------------------------------------------------------------|-----------------------------------|
| 1      | NM_053357       | <i>Ctnnb1</i>              | Catenin (cadherin associated protein), beta 1                                   | 1.99                              |
| 2      | NM_171992       | <i>Ccnd1</i>               | Cyclin D1                                                                       | 1.48                              |
| 3      | NM_012953       | <i>Fosl1</i>               | Fos-like antigen 1                                                              | 1.72                              |
| 4      | XM_220632       | <i>Foxn1</i>               | Forkhead box N1                                                                 | 1.66                              |
| 5      | NM_001007597    | <i>Fshb</i>                | Follicle stimulating hormone beta                                               | 1.69                              |
| 6      | NM_172035       | <i>Fzd2</i>                | Frizzled homologue 2                                                            | 1.43                              |
| 7      | XM_215187       | <i>Lrp5</i> ,<br>predicted | Low density lipoprotein receptor-related protein 5 (predicted)                  | 1.72                              |
| 8      | NM_021594       | <i>Slc9a3r1</i>            | Solute carrier family 9 (sodium/hydrogen exchanger), isoform 3 regulator 1      | 1.43                              |
| 9      | NM_133524       | <i>Tcfe2a</i>              | Transcription factor E2a                                                        | 1.61                              |
| 10     | NM_001009695    | <i>Wnt7b</i>               | Wingless-related MMTV integration site 7B                                       | 1.59                              |
| 11     | NM_024405       | <i>Axin1</i>               | Axin1                                                                           | -2.58                             |
| 12     | NM_022267       | <i>Ccnd2</i>               | Cyclin D2                                                                       | -2.29                             |
| 13     | NM_053824       | <i>Csnk2a1</i>             | Casein kinase II, alpha 1                                                       | -1.42                             |
| 14     | NM_031021       | <i>Csnk2b</i>              | Casein kinase 2, beta subunit                                                   | -3.03                             |
| 15     | NM-019201       | <i>Ctbp1</i>               | C-terminal binding protein 1                                                    | -2.32                             |
| 16     | NM-053342       | <i>Cxxc4</i>               | CXXC finger 4                                                                   | -1.43                             |
| 17     | NM_031820       | <i>Dvl1</i>                | Dishevelled, dsh homologue 1                                                    | -1.92                             |
| 18     | NM_017344       | <i>Gsk3a</i>               | Glycogen synthase kinase 3 alpha                                                | -1.67                             |
| 19     | NM-032080       | <i>Gsk3b</i>               | Glycogen synthase kinase 3 beta                                                 | -1.51                             |
| 20     | NM-012603       | <i>Myc</i>                 | Myc                                                                             | -2.55                             |
| 21     | NM-017040       | <i>Ppp2cb</i>              | Protein phosphatase 2, catalytic subunit, beta isoform                          | -2.12                             |
| 22     | NM_001025418    | <i>Ppp2r1b</i>             | Protein phosphatase 2 (formerly 2A), regulatory subunit A (PR 65), beta isoform | -1.71                             |
| 23     | NM_057132       | <i>Rhoa</i>                | Ras homologue gene family, member A                                             | -1.32                             |
| 24     | NM_053738       | <i>Wif1</i>                | Wnt inhibitory factor 1                                                         | -1.92                             |

Quantification of expression of WNT target genes regulated by SDF-1 was achieved by measuring intensity of signal of each spot:subtracted average intensity of *Gapdh*

Superarray results, see also ESM Fig. 3

<sup>a</sup>Fold change

# Control

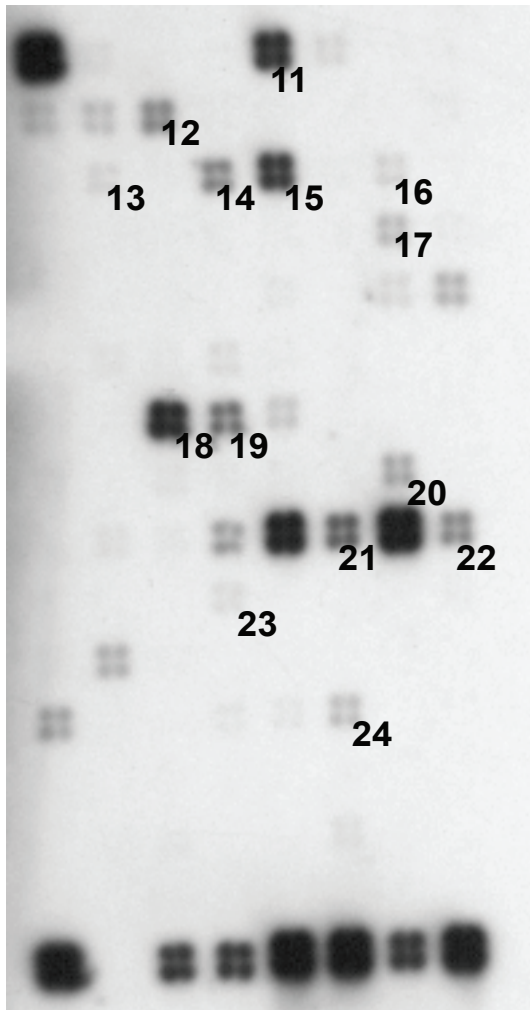

# SDF-1

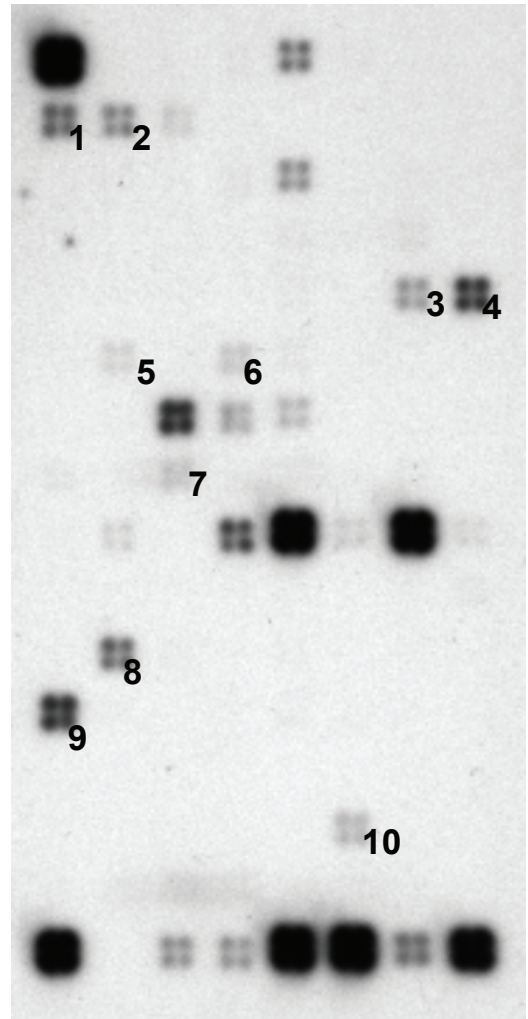

ESM Figure 5.

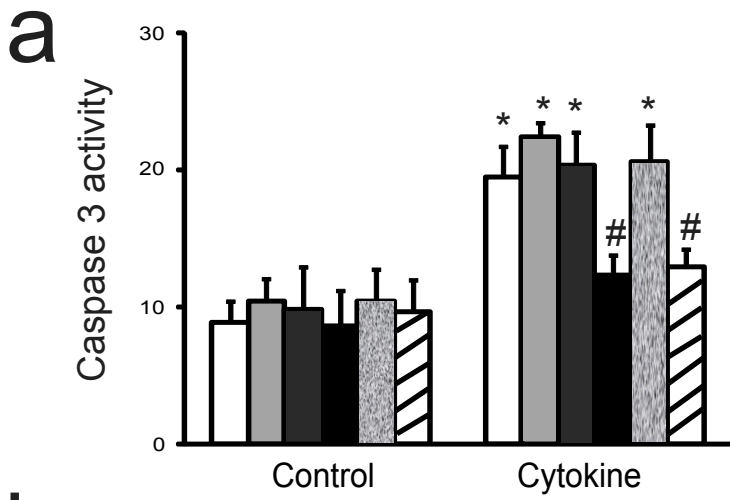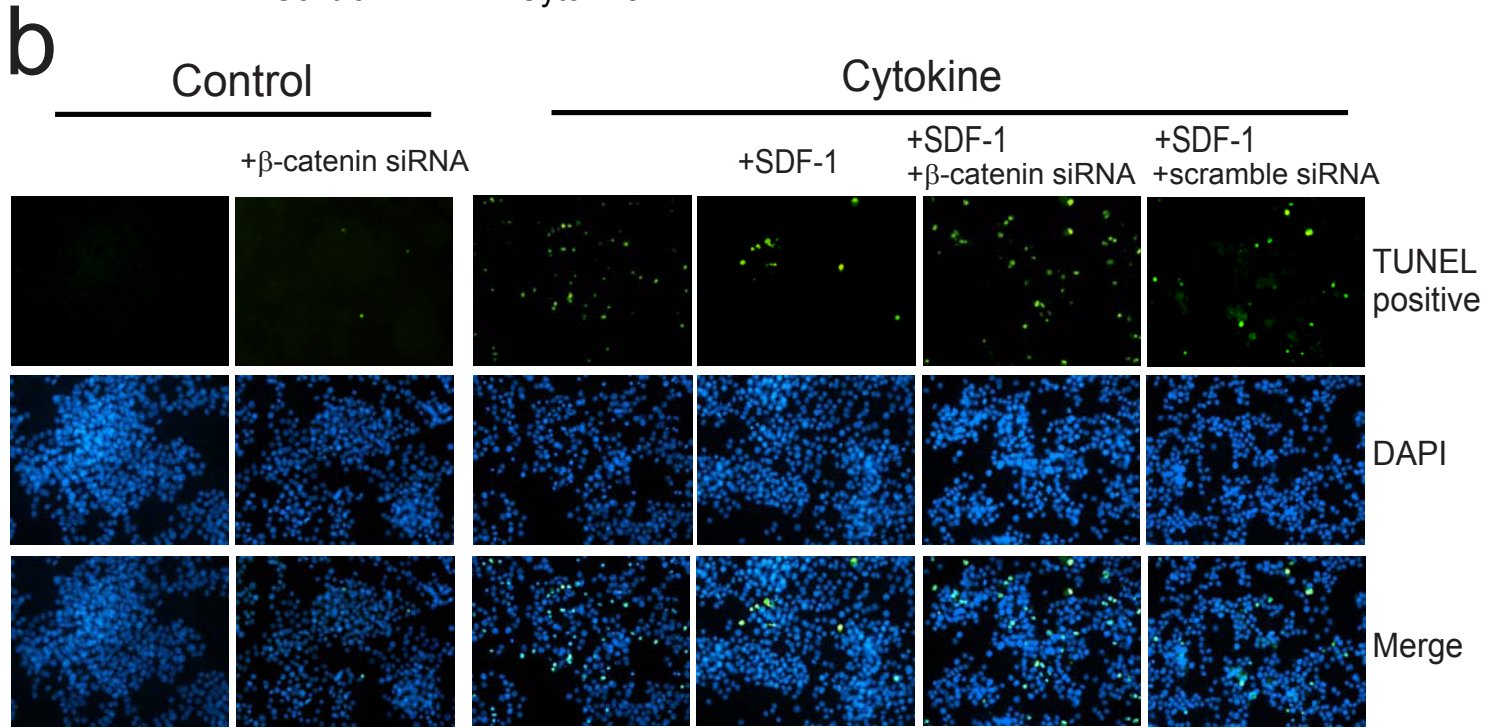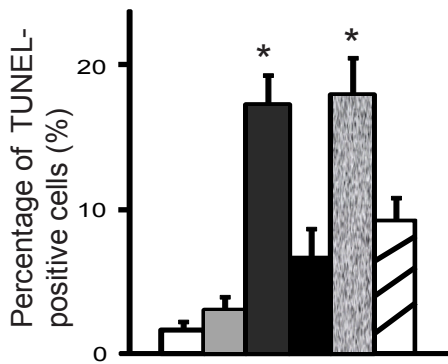

ESM Figure 4.

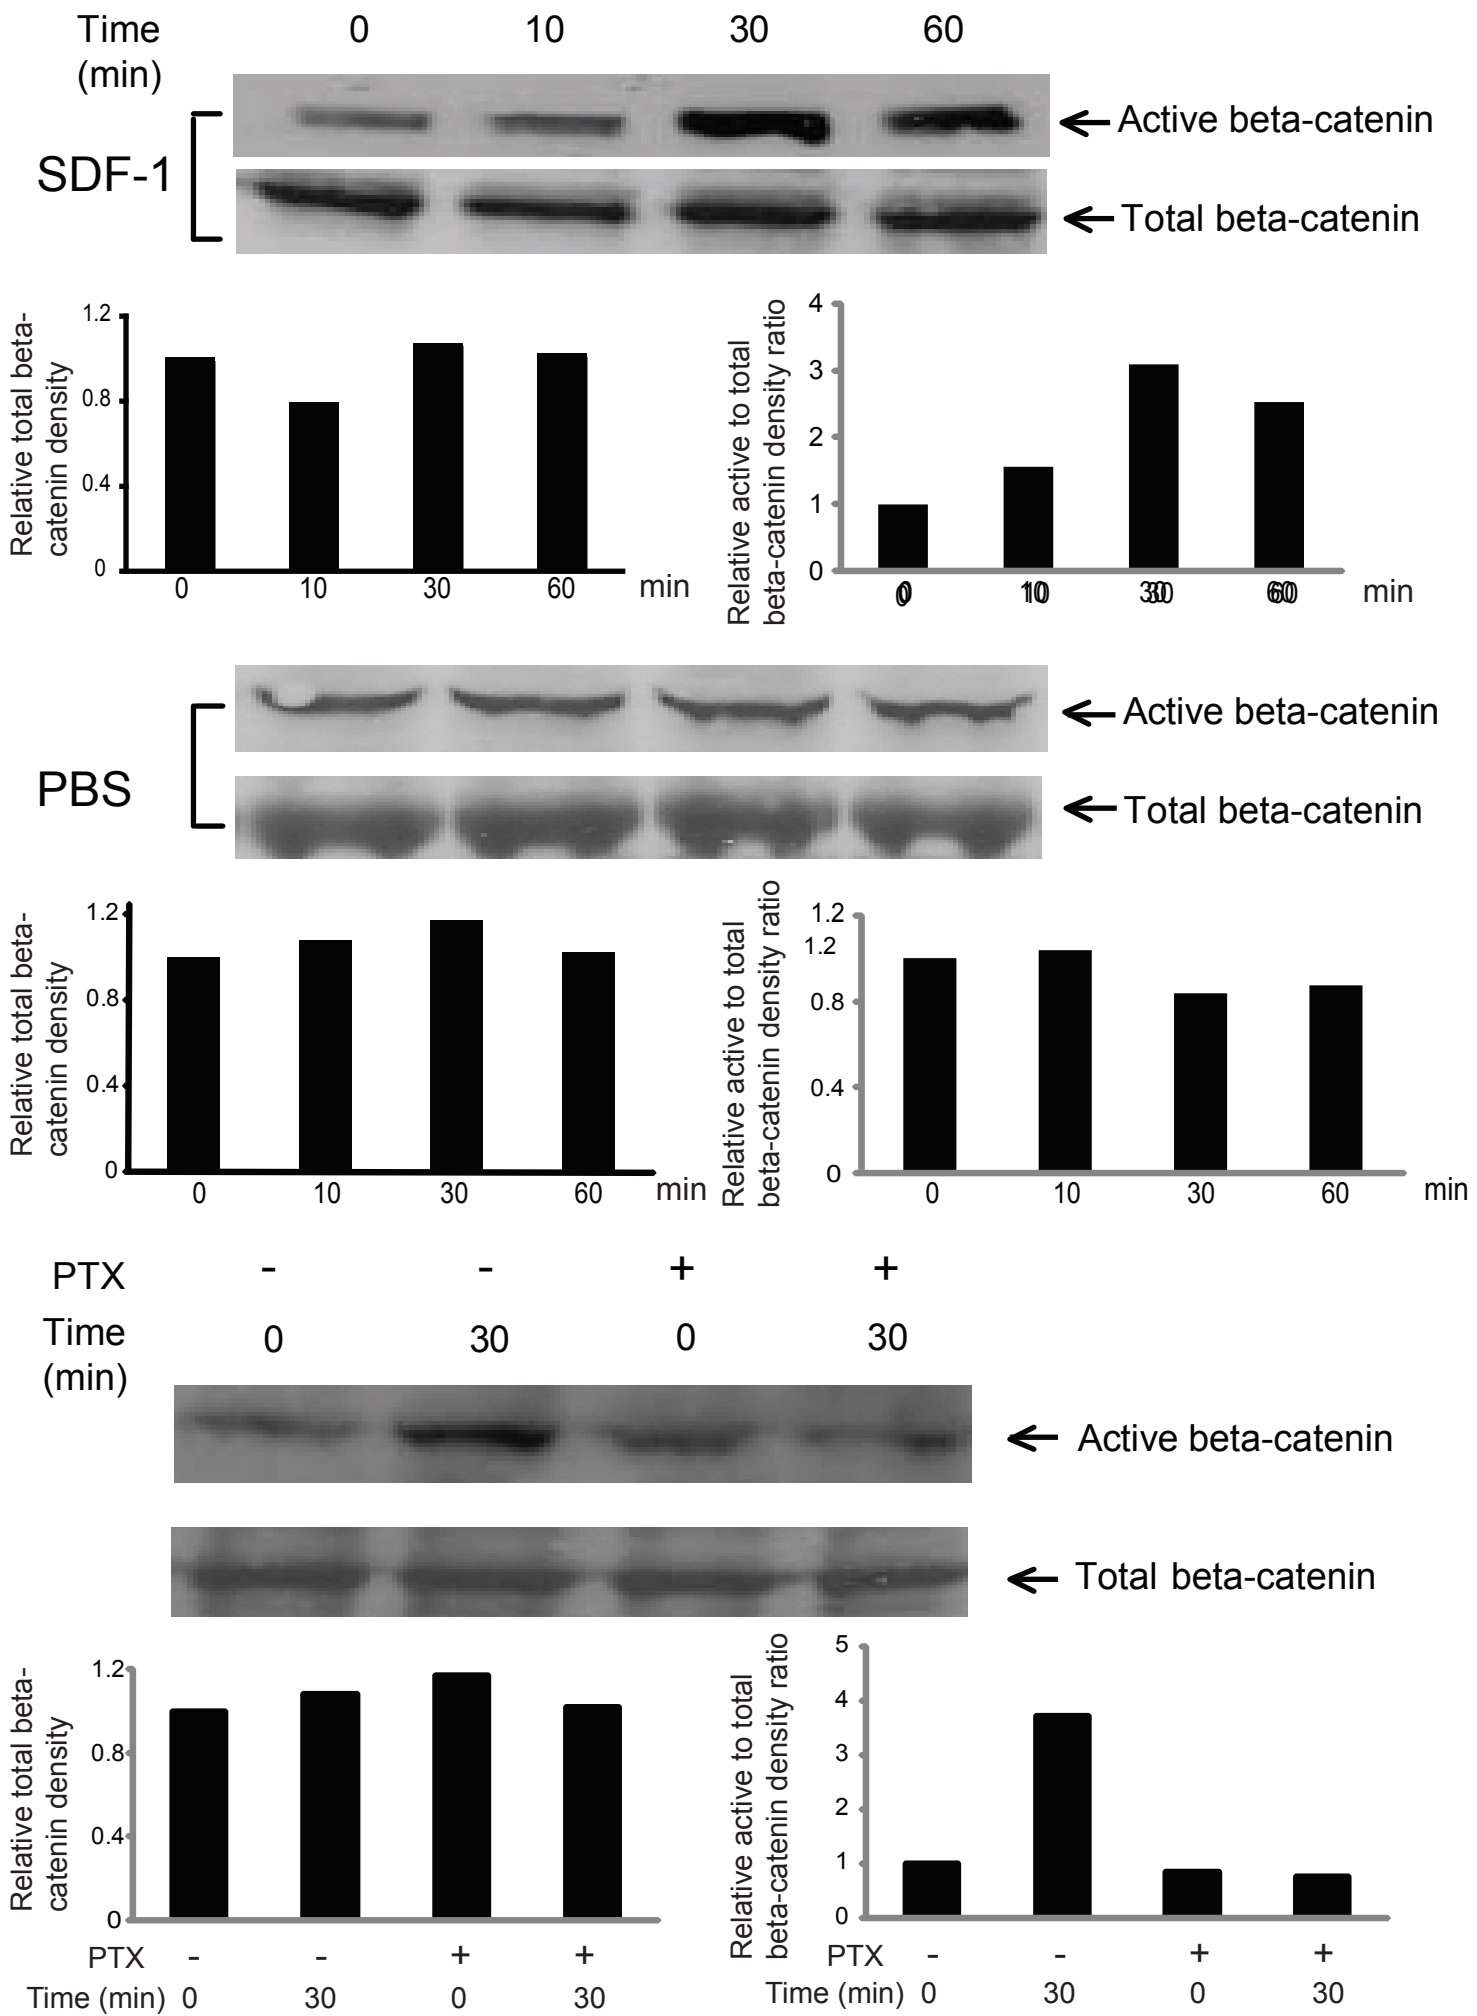

**ESM Figure 3.**

**a**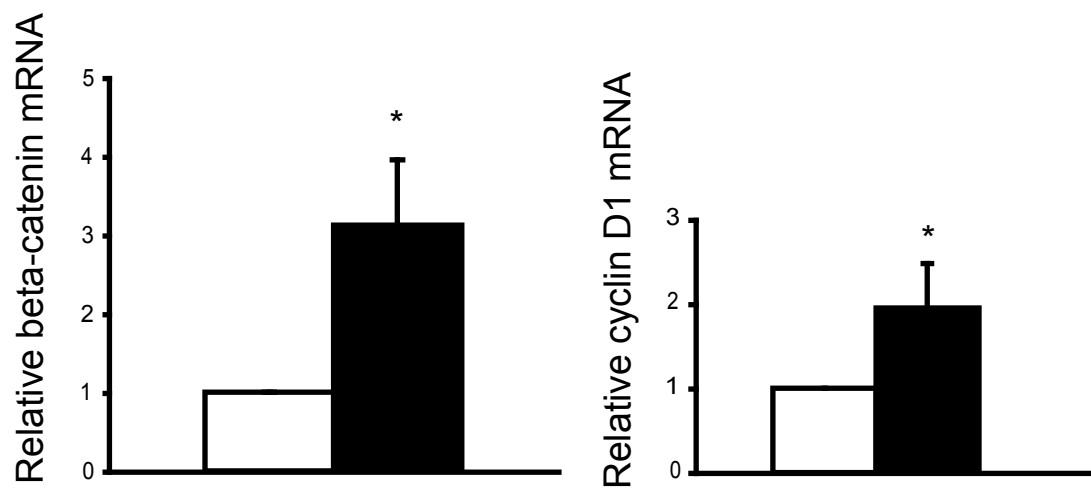**b**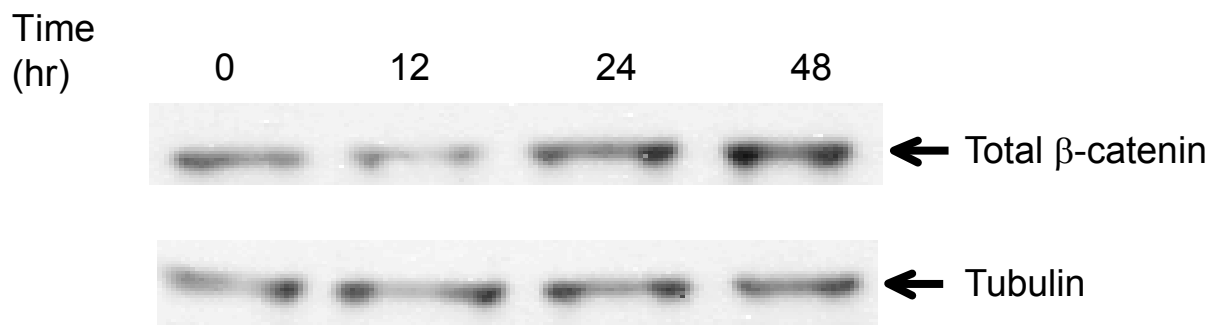**ESM Figure 2.**

(118 probes) (SuperArray) were hybridised with these biotin-labelled targets (5 µg/array at 60°C overnight). The filters were washed and subsequently incubated with alkaline phosphatase-conjugated streptavidin and CDPStar substrate. The chemiluminescent images were captured using a digital station (Kodak 440). For quantification, the spot intensity was measured and normalised to the value of the housekeeping gene *Gapdh*. Fold-changes in gene expression levels were determined by comparing hybridisation densities of SDF-1-treated versus untreated INS-1 cells. Real-time RT-PCR was carried out with a kit (SYBR Green QPCR; Stratagene). Briefly, INS-1 cells were treated with 10 nmol/l SDF-1 or PBS vehicle control for 4 h. Total RNA was reverse-transcribed to cDNA using Super-Script II reverse transcriptase (Invitrogen). Real-time PCR was performed to amplify cyclin D1 and beta-catenin with the primers as described [1].

*Statistical analysis* Statistical analysis was done using an independent samples *t* test.

Differences were considered statistically significant at  $p < 0.05$ .

## **Reference**

1. Liu Z, Habener JF (2008) Glucagon-like peptide-1 activation of TCF7L2-dependent WNT signaling enhances pancreatic beta cell proliferation. *J Biol Chem* 283:8723–8735

**a**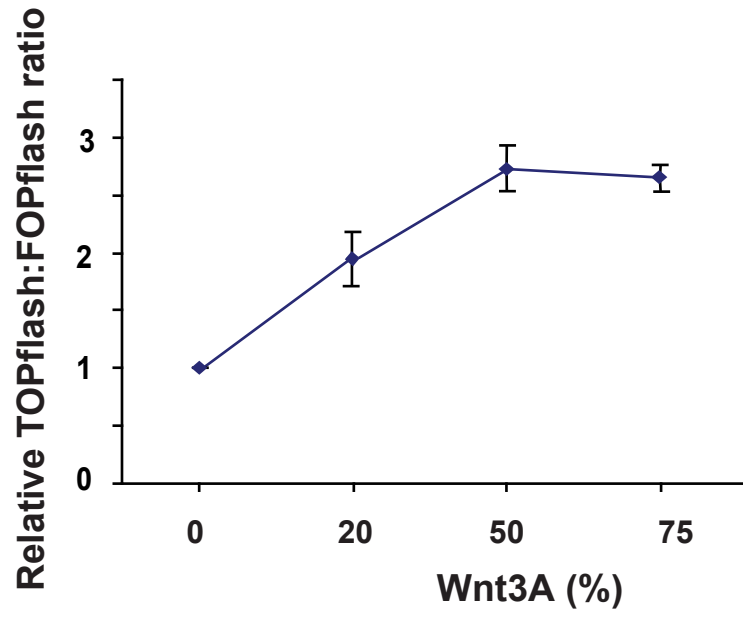**b**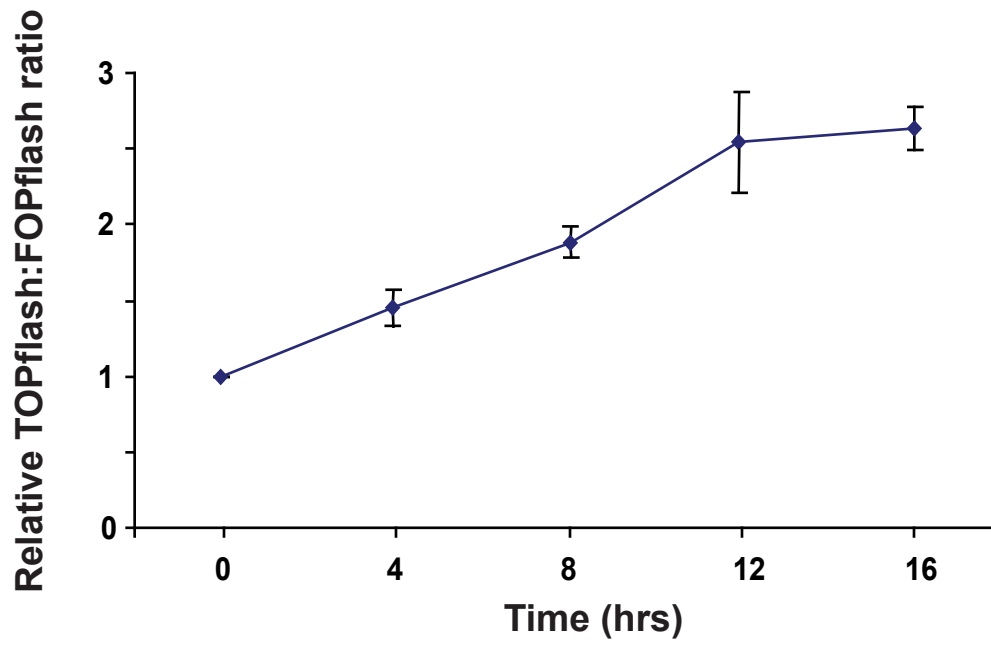

ESM Figure 1.
